# Supplementary material
Source: PubMed Central journal article supplement (PMC1183368)

C 1 3 4 C 2 13 N C

Double crossover mutants [6.4 kb]

10kb

5kb

Single crossover mutants [7.2 ; 5.4 kb]

1.5kb

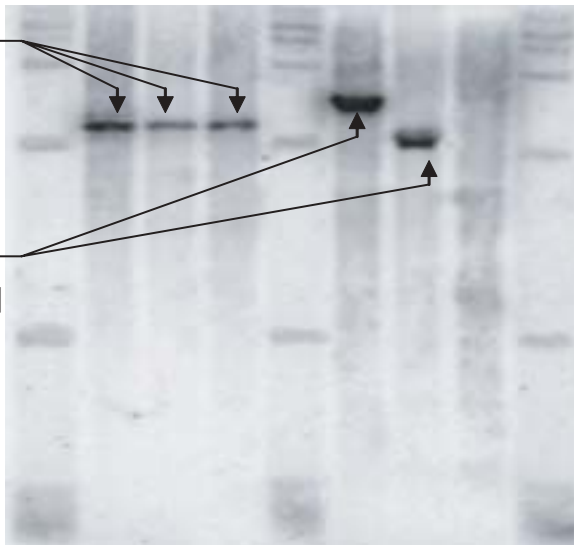

C 1 2 3 4 5 6 7 8 C N C

Double crossover  
mutants [13 kb]  
Single crossover  
mutants [5; 12 kb]

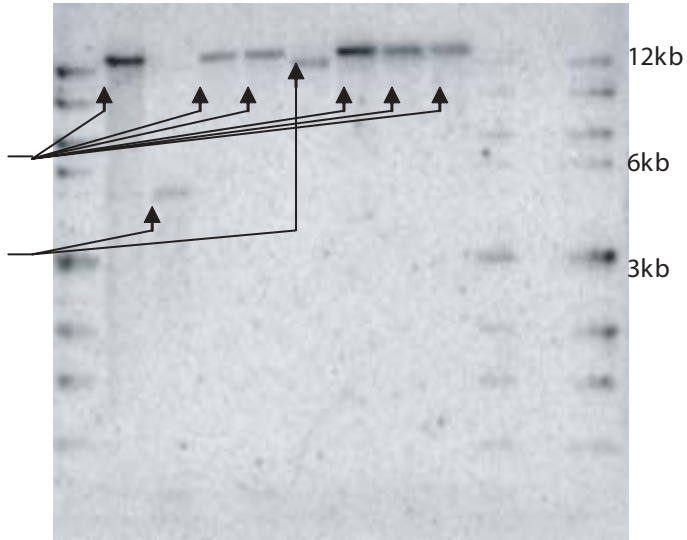

Supplement: aem_71_8_4862__1.pdf [file aem_71_8_4862__1.pdf]
